# Supplementary material for: Estrogen Receptor Expression in 21-Gene Recurrence Score Predicts Increased Late Recurrence for Estrogen-Positive/HER2-Negative Breast Cancer
Source: Oxford University Press journal article supplement (doi:10.1158/1078-0432.ccr-14-2842), 2015-06-14
Supplement: 10780432ccr142842-sup-140446_1_supp_0_nps7fm.docx [file 10780432ccr142842-sup-140446_1_supp_0_nps7fm.docx]

**Supplementary Figure S1:** CONSORT diagram of the derivation of this cohort from the whole ATAC trial population.
